# Supplementary material for: Genome-wide analysis of the Dof gene family in durian reveals fruit ripening-associated and cultivar-dependent Dof transcription factors
Source: PubMed Central journal article supplement (PMC6702166; doi:10.1038/s41598-019-48601-7), 2019-08-20
Supplement: 41598_2019_48601_MOESM1_ESM.pdf [file 41598_2019_48601_MOESM1_ESM.pdf]

## **Genome-Wide Analysis of the *Dof* Gene Family in Durian Reveals Fruit Ripening-Associated and Cultivar-Dependent Dof Transcription Factors**

Gholamreza Khaksar<sup>1</sup>, Wassakarn Sangchay<sup>1</sup>, Pinnapat Pinsorn<sup>1</sup>, Lalida Sangpong<sup>1</sup>, Supaart Sirikantaramas<sup>1,2,\*</sup>

<sup>1</sup>Molecular Crop Research Unit, Department of Biochemistry, Faculty of Science, Chulalongkorn University, 254 Phayathai Road, Bangkok 10330, Thailand

<sup>2</sup>Omics Sciences and Bioinformatics Center, Chulalongkorn University, 254 Phayathai Road, Bangkok 10330, Thailand

\*Corresponding author. E-mail: [supaart.s@chula.ac.th](mailto:supaart.s@chula.ac.th)

Supplementary material for this submission is available as follows:

Supplementary Table S1

Supplementary Table S2

Supplementary Table S3

Supplementary Table S4

Supplementary Figure S1

Supplementary Figure S2

Supplementary Figure S3

Supplementary Figure S4

Supplementary Figure S5

Supplementary Figure S6

Supplementary Figure S7

Supplementary Figure S8

**Supplementary Table S1. Sequence similarities among DzDof sequences.** Numbers indicate percent homologies at the amino acid level. The protein sequences of 24 DzDofs were used as input queries to find sequence similarities using the web-based tool Clustal Omega (<https://www.ebi.ac.uk/Tools/msa/clustalo/>), using its default parameters. The highest and lowest similarities are highlighted in yellow.

|    |          | DzDof 1.1 | DzDof 3.7 | DzDof 5.7 | DzDof 2.2 | DzDof 3.6 | DzDof 2.4 | DzDof 5.1 | DzcDof 2 | DzcDof 3 | DzcDof 1 | DzDof 1.5 | DzDof 1.4 | DzDof 1.2 | DzDof 3.5 | DzDof 4.5 | DzDof 5.3 | DzDof 5.4 | DzDof 3.1 | DzDof 1.6 | DzDof 3.4 | DzDof 2.5 | DzDof 4.6 | DzDof 2.1 | DzDof 5.6 |
|----|----------|-----------|-----------|-----------|-----------|-----------|-----------|-----------|----------|----------|----------|-----------|-----------|-----------|-----------|-----------|-----------|-----------|-----------|-----------|-----------|-----------|-----------|-----------|-----------|
| 1  | DzDof1.1 | 100       |           |           |           |           |           |           |          |          |          |           |           |           |           |           |           |           |           |           |           |           |           |           |           |
| 2  | DzDof3.7 | 85.58     | 100       |           |           |           |           |           |          |          |          |           |           |           |           |           |           |           |           |           |           |           |           |           |           |
| 3  | DzDof5.7 | 38.26     | 37.79     | 100       |           |           |           |           |          |          |          |           |           |           |           |           |           |           |           |           |           |           |           |           |           |
| 4  | DzDof2.2 | 34.71     | 34.85     | 34.15     | 100       |           |           |           |          |          |          |           |           |           |           |           |           |           |           |           |           |           |           |           |           |
| 5  | DzDof3.6 | 31.56     | 30.15     | 32.06     | 55.48     | 100       |           |           |          |          |          |           |           |           |           |           |           |           |           |           |           |           |           |           |           |
| 6  | DzDof2.4 | 31.56     | 30.15     | 34.22     | 56.41     | 56.97     | 100       |           |          |          |          |           |           |           |           |           |           |           |           |           |           |           |           |           |           |
| 7  | DzDof5.1 | 31.68     | 29.50     | 33.46     | 53.23     | 56.13     | 89.85     | 100       |          |          |          |           |           |           |           |           |           |           |           |           |           |           |           |           |           |
| 8  | DzcDof2  | 26.64     | 24.61     | 28.23     | 25.48     | 23.76     | 25.18     | 24.91     | 100      |          |          |           |           |           |           |           |           |           |           |           |           |           |           |           |           |
| 9  | DzcDof3  | 27.82     | 26.53     | 28.86     | 28.63     | 26.59     | 25.84     | 25.19     | 58.63    | 100      |          |           |           |           |           |           |           |           |           |           |           |           |           |           |           |
| 10 | DzcDof1  | 26.61     | 24.80     | 24.72     | 25.46     | 23.94     | 25.44     | 24.74     | 46.79    | 43.42    | 100      |           |           |           |           |           |           |           |           |           |           |           |           |           |           |
| 11 | DzDof1.5 | 34.51     | 33.33     | 31.76     | 33.81     | 33.56     | 31.97     | 31.29     | 40.26    | 39.60    | 40.70    | 100       |           |           |           |           |           |           |           |           |           |           |           |           |           |
| 12 | DzDof1.4 | 29.91     | 28.91     | 29.90     | 31.63     | 30.59     | 29.82     | 29.86     | 25.35    | 28.14    | 24.56    | 35.83     | 100       |           |           |           |           |           |           |           |           |           |           |           |           |
| 13 | DzDof1.2 | 23.66     | 25.79     | 27.63     | 27.23     | 28.32     | 28.63     | 27.88     | 25.50    | 25.51    | 22.82    | 31.51     | 29.55     | 100       |           |           |           |           |           |           |           |           |           |           |           |
| 14 | DzDof3.5 | 28.99     | 29.76     | 27.57     | 31.05     | 28.28     | 35.35     | 34.36     | 27.03    | 28.96    | 26.32    | 33.59     | 34.34     | 38.02     | 100       |           |           |           |           |           |           |           |           |           |           |
| 15 | DzDof4.5 | 33.66     | 34.65     | 30.43     | 33.95     | 31.53     | 32.74     | 30.80     | 30.20    | 29.15    | 25.00    | 34.75     | 32.09     | 27.97     | 29.91     | 100       |           |           |           |           |           |           |           |           |           |
| 16 | DzDof5.3 | 32.56     | 32.55     | 31.80     | 35.87     | 32.33     | 34.62     | 33.62     | 30.81    | 28.37    | 25.22    | 33.33     | 31.25     | 28.74     | 29.57     | 87.86     | 100       |           |           |           |           |           |           |           |           |
| 17 | DzDof5.4 | 33.33     | 33.33     | 31.52     | 34.95     | 35.57     | 31.47     | 30.85     | 27.32    | 27.80    | 23.01    | 38.79     | 33.78     | 29.47     | 29.41     | 32.79     | 33.33     | 100       |           |           |           |           |           |           |           |
| 18 | DzDof3.1 | 36.09     | 35.93     | 36.69     | 36.14     | 33.92     | 35.88     | 35.43     | 32.05    | 31.61    | 28.57    | 43.30     | 33.15     | 32.78     | 31.07     | 33.80     | 34.40     | 35.68     | 100       |           |           |           |           |           |           |
| 19 | DzDof1.6 | 32.75     | 35.12     | 31.32     | 30.90     | 30.60     | 29.28     | 30.11     | 31.55    | 31.33    | 27.23    | 42.31     | 29.28     | 28.72     | 31.07     | 31.28     | 29.22     | 32.73     | 41.01     | 100       |           |           |           |           |           |
| 20 | DzDof3.4 | 32.00     | 32.56     | 32.18     | 36.47     | 32.95     | 34.10     | 33.15     | 31.93    | 29.52    | 25.82    | 39.22     | 32.39     | 31.15     | 30.86     | 28.64     | 26.76     | 36.57     | 43.93     | 47.16     | 100       |           |           |           |           |
| 21 | DzDof2.5 | 35.96     | 32.84     | 32.98     | 36.87     | 34.74     | 35.79     | 35.23     | 30.69    | 32.31    | 28.43    | 33.06     | 29.36     | 31.60     | 33.17     | 35.24     | 34.55     | 32.86     | 37.10     | 32.80     | 33.51     | 100       |           |           |           |
| 22 | DzDof4.6 | 32.68     | 31.53     | 34.21     | 40.46     | 38.38     | 39.46     | 37.97     | 29.95    | 30.53    | 29.23    | 32.00     | 30.52     | 30.19     | 34.15     | 32.85     | 32.72     | 33.65     | 38.04     | 33.33     | 33.70     | 64.93     | 100       |           |           |
| 23 | DzDof2.1 | 28.44     | 30.62     | 35.61     | 33.67     | 33.17     | 32.18     | 31.22     | 32.62    | 32.61    | 26.44    | 38.53     | 34.50     | 35.27     | 31.86     | 35.24     | 34.04     | 35.02     | 39.18     | 36.41     | 31.77     | 37.77     | 39.30     | 100       |           |
| 24 | DzDof5.6 | 26.58     | 28.31     | 31.12     | 31.58     | 30.05     | 30.99     | 32.41     | 25.12    | 26.24    | 25.70    | 32.17     | 30.00     | 30.63     | 32.84     | 32.75     | 33.05     | 32.46     | 33.99     | 30.50     | 30.15     | 34.90     | 36.00     | 38.85     | 100       |

**Supplementary Table S2. List of primers for *DzDofs* used in this study.**

| Gene name | Corresponding gene ID | Forward primer (5'-3')    | Reverse primer (5'-3')    |
|-----------|-----------------------|---------------------------|---------------------------|
| DzcDof1   | XM_022890912.1        | CCCGGAAATGTCACCGTCTG      | AGTGTTTCAGACCAGAAAACAACAC |
| DzcDof2   | XM_022884508.1        | CCAACCTTCGTTAGCTTAGCCAC   | ACAGGAACTCTTCTTCTGTTCTCC  |
| DzcDof3   | XM_022882662.1        | ATTGGAGCTGCTGAAAAGGGC     | GGCACCATCAGCCACAATTAAC    |
| DzDof1.1  | XM_022885861.1        | CTGATCTTCCAGCAACTAATGGTG  | AAGGCATATACAGCTAGCCAACA   |
| DzDof1.2  | XM_022897927.1        | TTCCACATGAATTGGCTAGT      | TAGAACCAACCCAGTAACGGT     |
| DzDof1.4  | XM_022864763.1        | GTCTCTACCGATCTCAACATGCC   | GAACACCCAAATCAAGAAAAGAGC  |
| DzDof1.5  | XM_022921573.1        | CGAGACTTTGGAGCAAAACCC     | GACCCATTGACATCACAGGA      |
| DzDof1.6  | XM_022916439.1        | TGCAGCAGAACACTCGTGA       | GGTGGTTTAATTGGCAACGCC     |
| DzDof2.1  | XM_022896728.1        | GCTGACCAATAAGGCAGTTCC     | CCGAAGTCCTGCAACTAACCA     |
| DzDof2.2  | XM_022874863.1        | GCAGACTAAACAAAGATTGGCAG   | CACACACAACCGTAGAACAAATC   |
| DzDof2.4  | XM_022888412.1        | TGTCAAGGCAATATTTGGGGG     | ATGATTGCTAGTGGATGAAGAGC   |
| DzDof2.5  | XM_022903860.1        | TGGGTTTGGTTTCAAAAGGCTG    | CAACACTGACAGAAGCAGTCC     |
| DzDof3.1  | XM_022865170.1        | TCCGGGATTAGGAGAGAGCAAT    | GAAAACCTGAAGAACCTGGAGTG   |
| DzDof3.4  | XM_022918231.1        | GGTGGCGATTACTTTTCTTGGT    | GGAACATGGAAAACACAATGAACC  |
| DzDof3.5  | XM_022889354.1        | CTGTGGTCGAATACTCACTCCT    | TACCAAACAATAGATTTGGATCGTG |
| DzDof3.6  | XM_022908803.1        | CGAATGAATTGCTTGCTACTCCA   | TCATGTCAGATCAAACCTCTCTGC  |
| DzDof3.7  | XM_022895569.1        | TGTGGCTGTAGGGGTAGCA       | CCATCCTGGTACACTTTCACAT    |
| DzDof4.5  | XM_022921611.1        | ATGTGGGTGTTTCGTTCTCTGT    | CGCACCAACAAAGCAGAAGT      |
| DzDof4.6  | XM_022877869.1        | TTGGGGTAAAAATGTAGGAGAGGAG | TGACGCATATGGTTGCTCTTTC    |
| DzDof5.1  | XM_022891906.1        | AACCTCCAGACACCTTATCCA     | GCGCAATGCATATCATCAGTAGG   |
| DzDof5.3  | XM_022868588.1        | TTTCTTCAGCCACTGCTGTACT    | GCTTTTTGCATACACAAGGCAA    |
| DzDof5.4  | XM_022920120.1        | TGGCAAGGGAGTGGAGATCA      | ACGGGATATAGAGGGTAGGATG    |
| DzDof5.6  | XM_022881477.1        | AAGGGGAAACTGTGTGGTGAAT    | CTTTTGCCCAAGACACCCAATC    |
| DzDof5.7  | XM_022885261.1        | GGTAGACCCTAAAAGGAAGATATGG | CAAGGTCGACATGTTGATATCTGA  |

**Supplementary Table S3. List of primers used for expression analysis of auxin and ethylene biosynthetic genes in durian pulp.**

| Gene                                                         | Forward primer (5'-3') | Reverse primer (5'-3') |
|--------------------------------------------------------------|------------------------|------------------------|
| <i>Auxin biosynthetic genes</i>                              |                        |                        |
| <i>DzTAA1</i>                                                | TTGAATATGGACAGCGCCTCA  | AAGTTGCAGTAGTCTGGCGA   |
| <i>DzYUCCA4</i>                                              | TAACCCTCCAAAACCGCAGAA  | TTCCCAAAGTACCCGACCAAG  |
| <i>Ethylene biosynthetic genes</i>                           |                        |                        |
| <i>ACC synthase (DzACS)</i>                                  | CAGAAATCATTGGCCTGGTAG  | CTGAGTTGGAGCTGAAATGG   |
| <i>ACC oxidase (DzACO)</i>                                   | TGGAGAAAGAAGCAGAGGAG   | AAGTTGTTCCCTGGCTTTC    |
| <i>Elongation factor 1 alpha (DzEF-1<math>\alpha</math>)</i> | GAAACCTTCTCTGCGTACC    | CTCCACACTCTTGATGACAC   |

**Supplementary Table S4. List of primers used for transient expression of *DzDof2.2* in *Nicotiana benthamiana* and expression analysis of auxin biosynthetic genes in *N. benthamiana* leaves**

| Gene                                                         | Forward primer (5'-3')                     | Reverse primer (5'-3')                                   |
|--------------------------------------------------------------|--------------------------------------------|----------------------------------------------------------|
| <u>For gene cloning</u>                                      |                                            |                                                          |
| <i>DzDof2.2</i>                                              | <u>AAAAAGCAGGCT</u> ATGGTTTTCTCATCTGTTCCAG | <u>AGAAAGCTGGGT</u> CTATAAGAGATTATTAGTACTAGAAGAGTTGAGACC |
| <u>For expression analysis of auxin biosynthetic genes</u>   |                                            |                                                          |
| <i>NbTAA1</i>                                                | ATACTGGCGAAAGATGGGCAAC                     | CTGGCTTGATCCTGTCCCAAC                                    |
| <i>NbYUCCA3</i>                                              | AAGCTGATAGTCTGTAATGAGGGG                   | TTGGGATTTCTCTGGAGAGGG                                    |
| <i>Elongation factor 1 alpha (NbEF-1<math>\alpha</math>)</i> | TGAGGGACATGCGTCAAAC                        | GGAGCGGATACCAGTCATACA                                    |

Underlined sequences represent bases of the *attB1* or *attB2* site on the 5' end of each primer (for BP reaction).

**Supplementary Fig. S1. Exon-intron structures of *DzDofs*.** Green bars indicate exons. No introns were found for durian Dofs. *DzcDof* is durian cyclic Dof.

**Supplementary Fig. S2. Multilevel consensus sequences identified by MEME.** Protein sequences of *DzDofs* were used to identify conserved motifs among durian *DzDof* proteins. Ten conserved motifs were identified. Motif 1 represents the conserved Dof domain always observed at the N-terminus.

**Supplementary Fig. S3. Schematic distribution of conserved motifs in durian *DzDofs*.** Ten conserved motifs, identified by MEME, are represented in different colours. Motif 1 represents the conserved Dof domain. Several subgroups were distinguished based on their motif distributions, which was consistent with the phylogenetic analysis.

**Supplementary Fig. S4. Tissue-specific expression profiles of *DzDofs*.** The Illumina RNA-seq data were used to analyse the expression levels of *DzDofs* in different tissues, including root, stem, leaf, and pulp. The higher expression for each gene was presented in red; otherwise, blue was used. Data were sum normalized, log transformed and autoscaled.

**Supplementary Fig. S5. Comparison of the expression levels of ten potential cultivar-dependent *DzDofs* between the Monthong and Chaneé cultivars.** Expression levels of ten potential cultivar-dependent *DzDofs* during ripening were compared at three different stages (unripe, midripe, and ripe) between the Monthong and Chaneé cultivars. For each *DzDof*, a comparison was made between the two cultivars at each stage. Three independent biological replicates were used. Three technical replicates were also performed for each biological replicate. An asterisk (\*) above the bars indicates a significant difference between the two cultivars (Student's *t*-test,  $P < 0.05$ ).

**Supplementary Fig. S6. Expression levels of ethylene biosynthetic genes in durian pulp.** The expression levels of ACC synthase (*DzACS*) and ACC oxidase (*DzACO*) were measured at three different stages (unripe, midripe, and ripe) during post-harvest ripening of Monthong and Chaneé cultivars. Comparisons were made between the two cultivars at each stage. Three independent biological replicates were used. Three technical replicates were also performed for each biological replicate. An asterisk (\*) above the bars indicates a significant difference between cultivars (Student's *t*-test,  $P < 0.05$ ). Comparisons were also made for one cultivar at different stages. Bars with different letters (lower case for Monthong and upper case for Chaneé) above them differed significantly according to Duncan's multiple range test ( $P < 0.05$ ).

**Supplementary Fig. S7. Nucleotide sequences of promoter regions of candidate auxin biosynthetic genes from durian (*DzTAA1* and *DzYUCCA4*).** Dof binding sites (AAAG and CTTT) are highlighted in yellow. The translational start site (ATG) is underlined.

**Supplementary Fig. S8. Nucleotide sequences of promoter regions of candidate auxin biosynthetic genes from *N. benthamiana* (*NbTAA1* and *NbYUCCA3*).** Dof binding sites (AAAG and CTTT) are highlighted in yellow. The translational start site (ATG) is underlined.

Supplementary Fig. S1

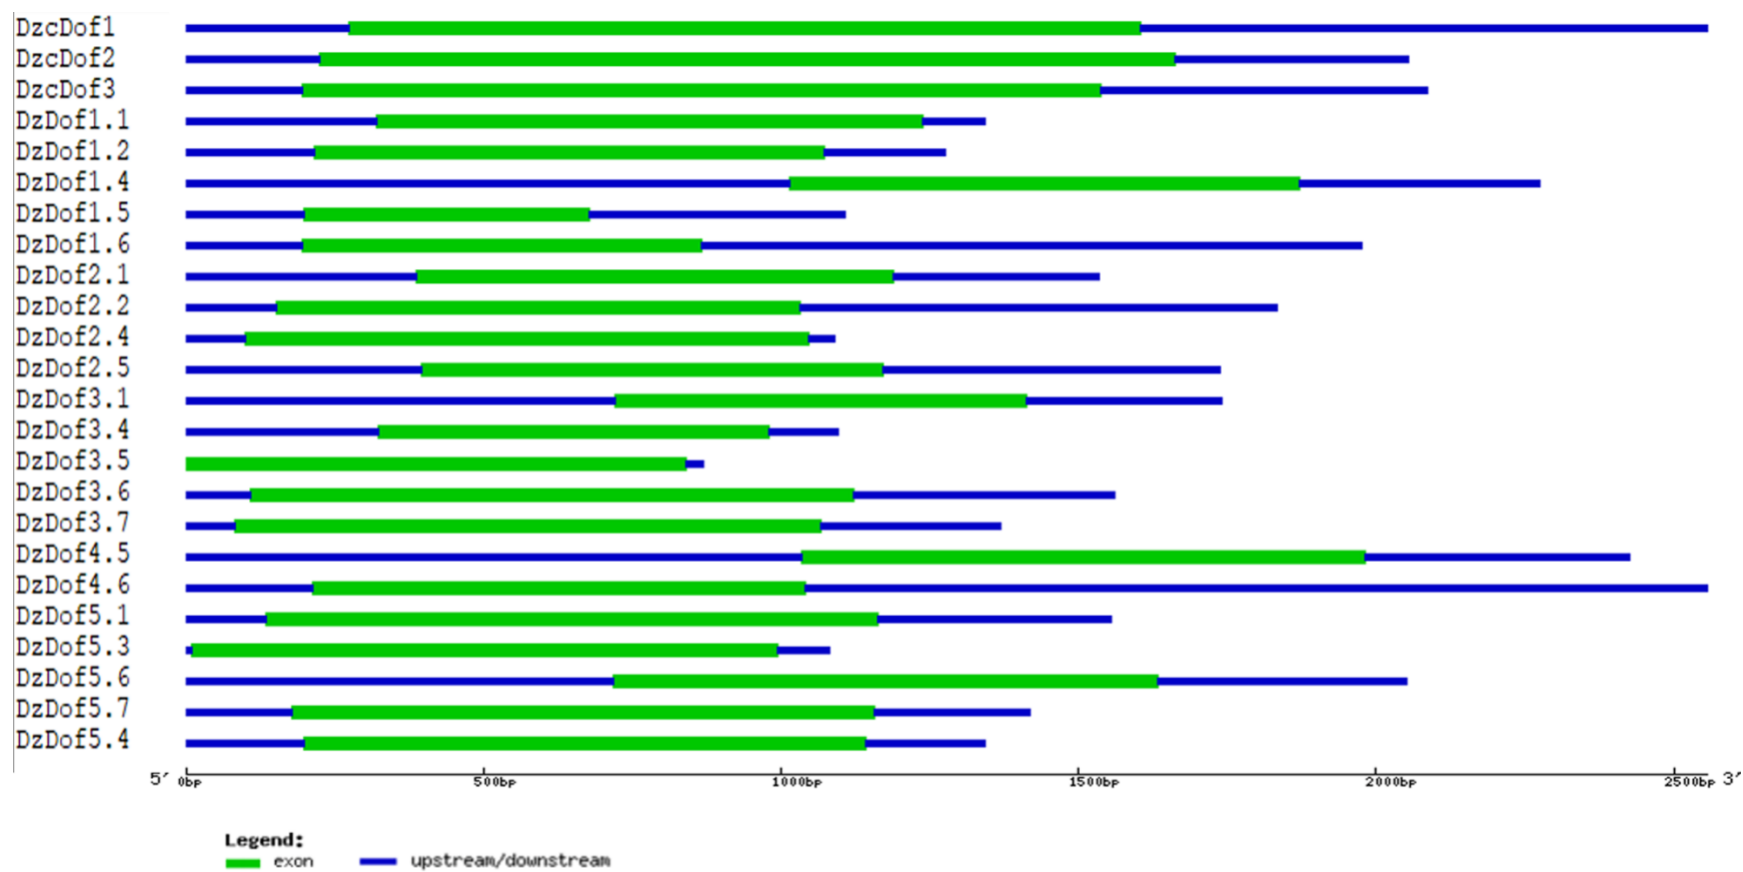

Supplementary Fig. S2

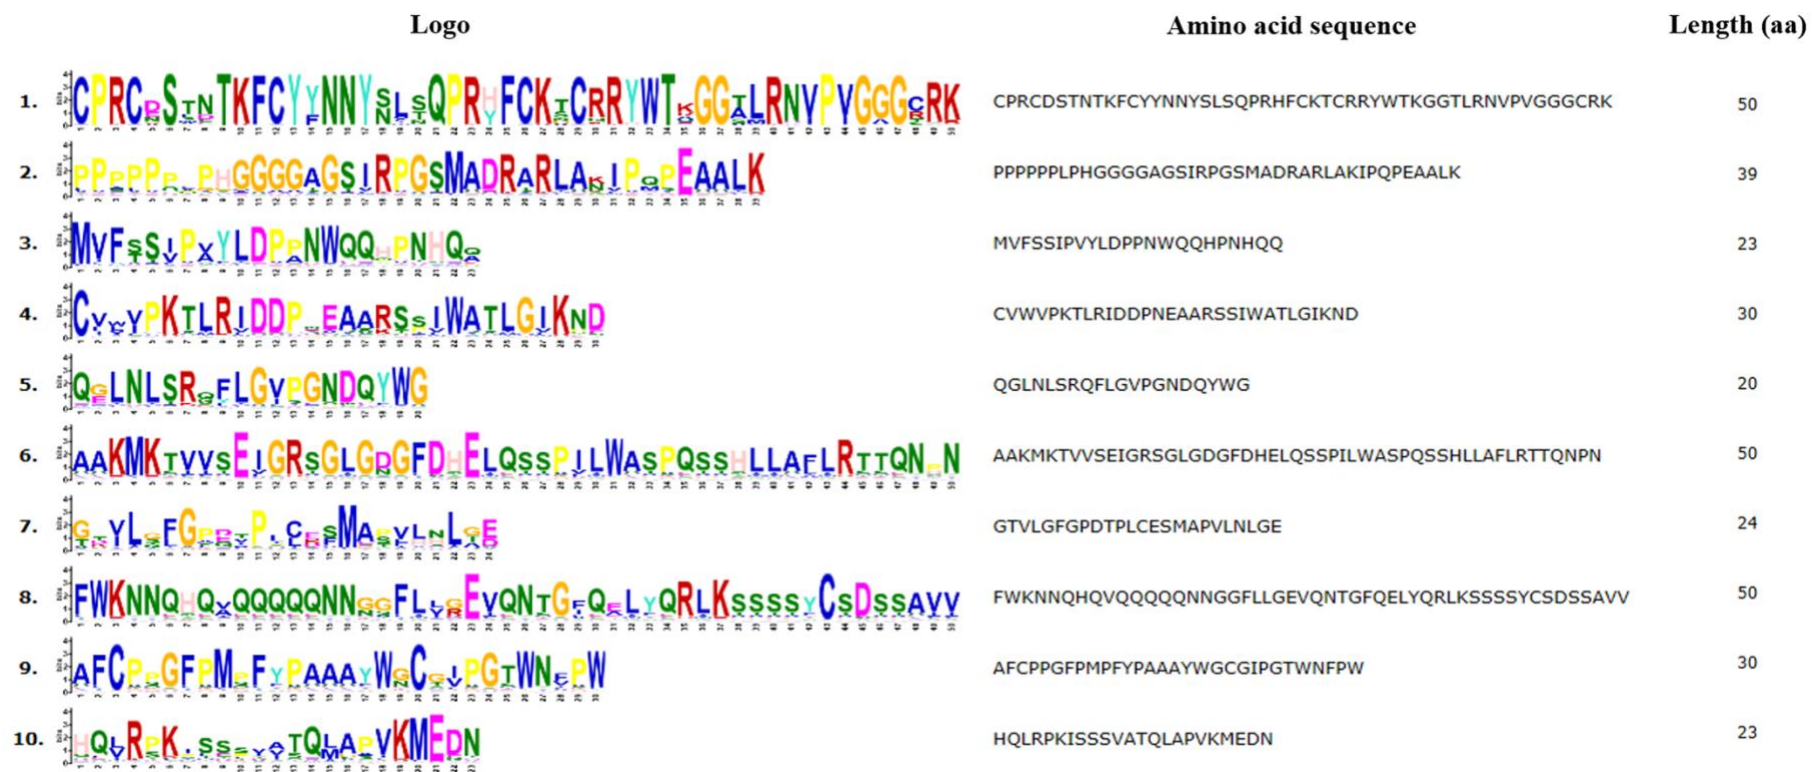



Supplementary Fig. S3

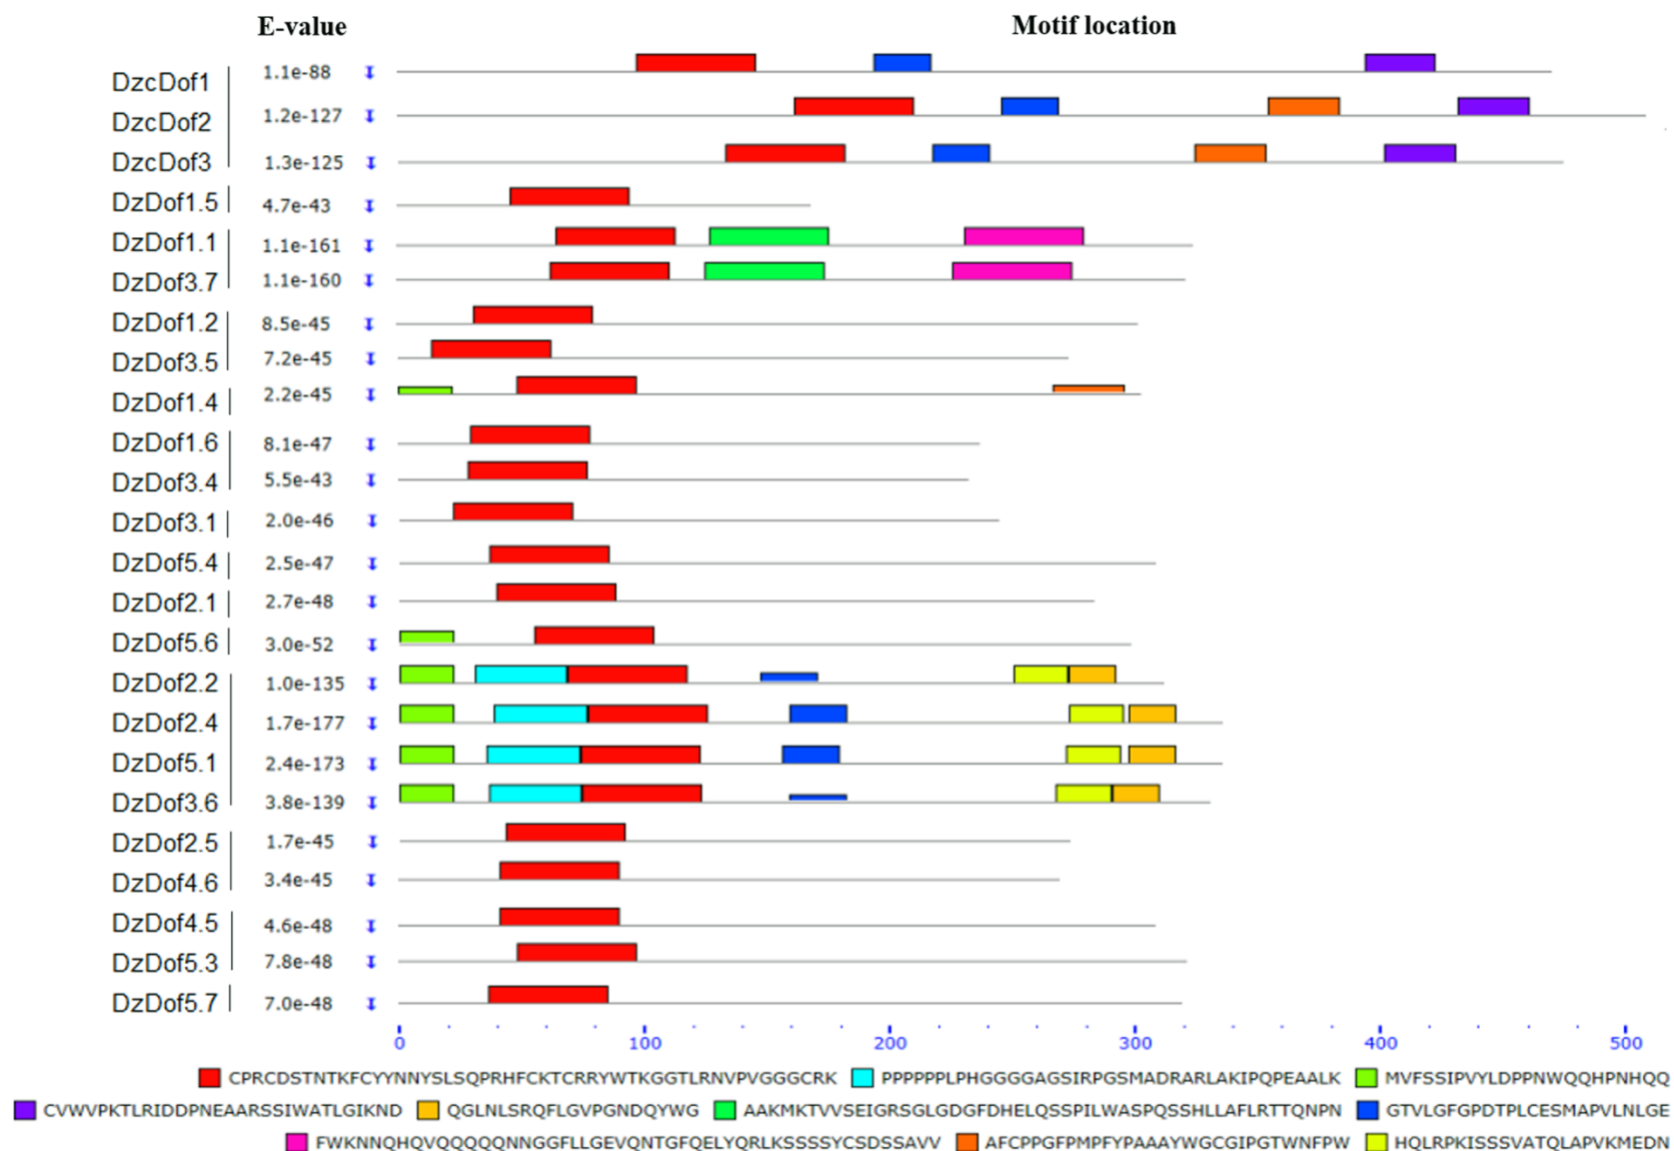

Supplementary Fig. S4

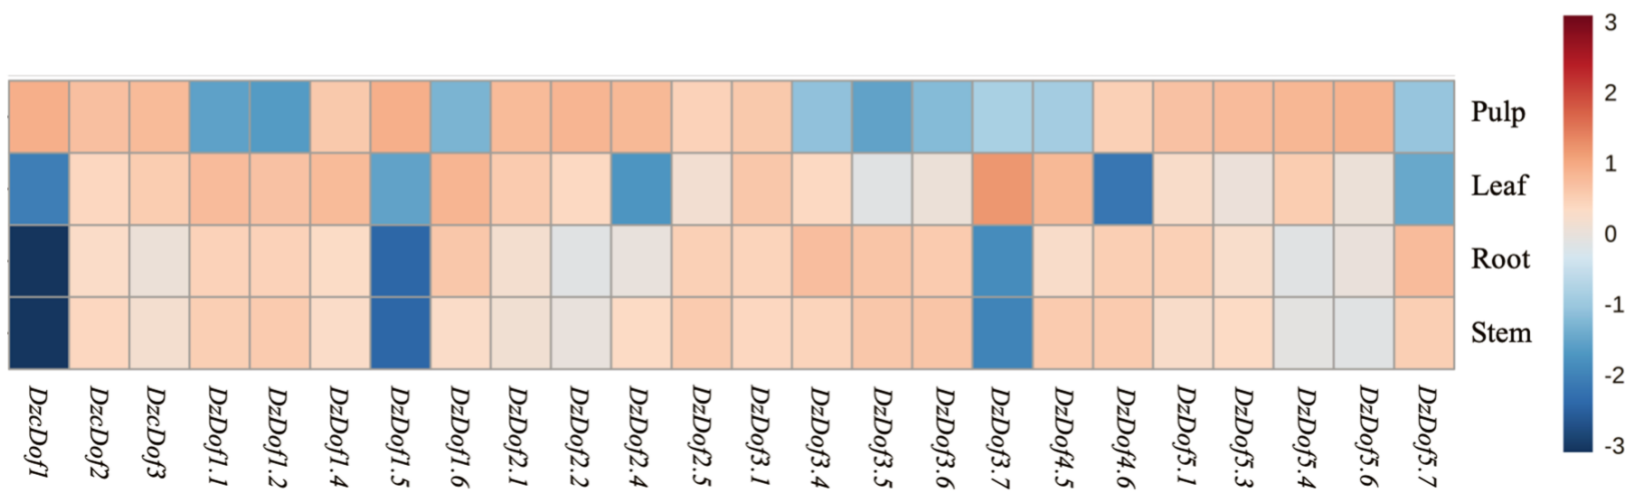

Supplementary Fig. S5

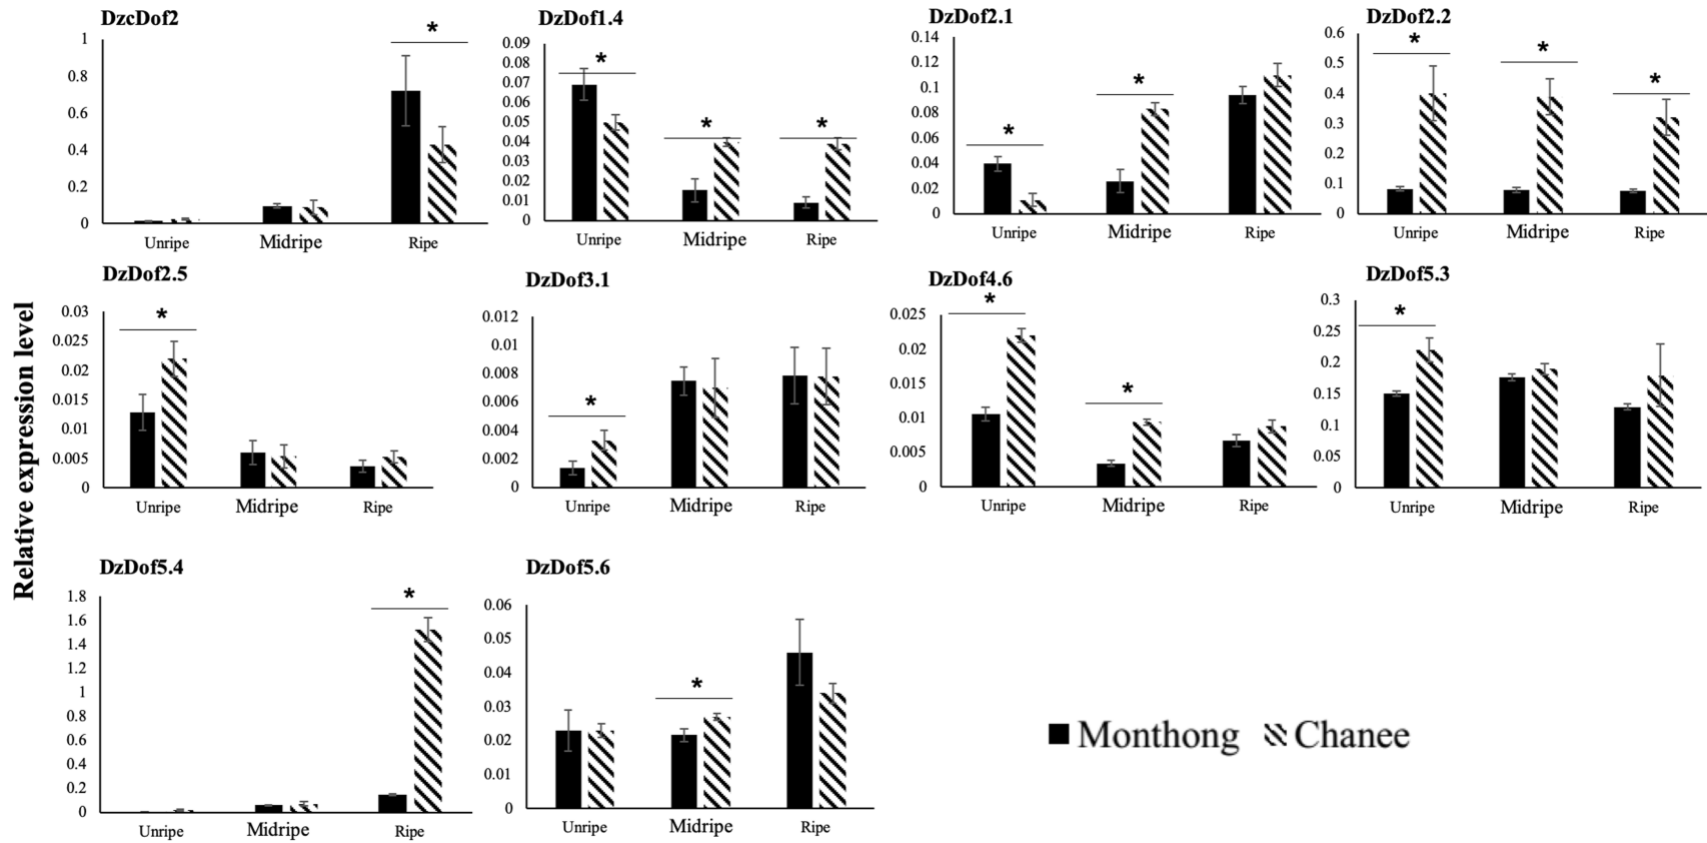

## Supplementary Fig. S6

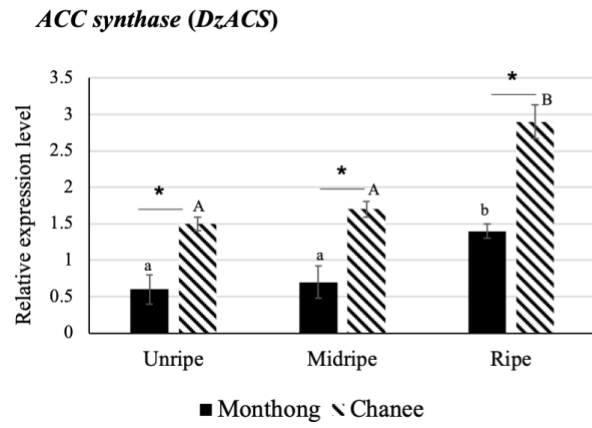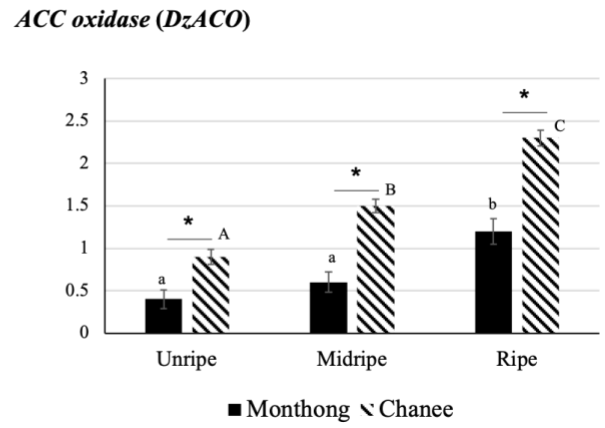

## Supplementary Fig. S7

### Promoter region of *DzTAA1*

ATAATGTTTGATTAGTTGTTTGAAGATACTATGAGAACACATATAACCATGAATTTGCTATTCAAACC  
CATGCGTTAAGAATCAAAAATAAATTTTTAAAGTTAATTGATTGGTGAAATACTTATTTGTGACAAAC  
CATTTTAGTTTCATAAAAAGTTCTTTAAAGCAAATAATGGTGTTCTCATCAAGTGTATAAAAAACATT  
TTAAAGTATGTTTTTCACTAATTCTGTTTCGAAAACTTTTGAAGTTTTGTCGTATATTTTCGTAAAAAAT  
TATAAGTTTTATGTAAATGTTCTACACCACTCAAACCTATTTTTATTTCTTATTAATTATTATTTTTATT  
TTTCATATTTTCAATCCCTAAATTTTCTAACGGTTACTATAATAAACCAAGTCTAGTTCTAGAGCATTTAG  
TTATCAAATTCATATGAAACAATTTTAAATATATAAAAGAAAAACCAATTATAGAAATTCAGTTTT  
AATTTACTGGAGAACGTGATTTGGTTAGGTTTAGCATATATAGTAAGTATTCCTTTAGATACAGTCATTG  
TGATTCCGAGATTTTCTGCCTTTCAAGGACTTTTGTGGGTTCCCTTTAAACAGTATCCGACAATTTT  
GTGGGAAACCTAAATTAAGAGCTTTTCCCAAAGTAAGTTGCTTTTAAATCTTATTTCTTTAGTAAGGGT  
ATTCTTAAATTTTATTTCAAATAAAGTTATTTTTGAGTCAATTAACCTACATGTCAGCATTTTATTCCAC  
CTATCGTTTTCTTTTGAATTTACGTTTTGTTTCTCTCTGTACGTTTTTAAACACATACATTCAATTTTTT  
TTTTCAAAAACCATTTCTCCAAAATCAATATTGCTTTAGATCTCAATTATGAGACAAATATATTATTACA  
AAAAAAAGAGAGTAAGCTTTGATTTGCATTCATTAGAGAATTTTTGTTTATGGCAATTATTCATAAG  
AAAATTAATAAAAAAAAAAATTCTATTGCAATTTAAATCAGACAAAAACATAACAATAAGTTCCTTGCTGA  
AGGAGAAGACATGTGTGTCCATATGTTTGATTTCCATATTGGATATGGGTTTGGTTGCAACAAGGATCCA  
TTATAATGTTGTCCACTTTGTACGTTTCTCATCTAAAGGGAAACCTAAGCACCAGGAGAAGATGATTTCA  
AAATGACAATTCTTTTGTGAAGATTTTAAATCCACTACTTCAAATTAGGGAGAGATGAAAGATTAAAG  
AATTGGGGAAAAAAAGGTTATATCATCAAAATTAATAAGATTTTTTTTTTTTTTAAATTTCTGGAGAGGCA  
AATAGAATCCAAGTTTGTATGATTTTCAATTTTACTACTTCTCGAGTTTTGTAGCTTTTTTTTTTTACTGTC  
ATTCAAGTTATGCTTATTCATGTCGATATGCAATTTTATATGTACTTTGATATTAATTTTGGAGTAAG  
ATAAATAGAATGAGATATAAGATTATTTTGCAAAGATTATACTTTTTCATGTGGGTATGTAATCATTG  
GTATAAATTTTGAATTTGATTTTGAATAAGAAAATTAGAATAAGACAGAGAAATATAAATTTTGAAGATT  
GATTTTAGTGTAATAAATAAGAATGAGATAGAGATTATTTTGTAAAGATAAGAATGTGATTGTTATAAG  
TAAGTAGAAATAAATTTTTTATTTTATTAATATGAGATATTGACATGGAAAGTACGCTGATTTGTA  
GTCCAAATAATGTAGAGTACTTTGTTTAGGGATTAAGTTTAAAGTACTCTGGTCAGGGAAATAAAGTT  
TCGAAGTGTCTAGTTTGGGAAAAAATCTGAGTTAGGGTTCATGAACCTTCCAATCTACAGCATTCTT  
CCCCCTATAATACCCATCTCCAGTTCCACTATCTTCCCTGAGAGAGGTCCCTTTATTATATATACAG  
GCAGAAGATTATTTTACAATCACTTTTGGAGAAGCCAGGATG

## Promoter region of *DzYUCCA4*

ATTTGAATTCGTTTAAATATTCGTTTAAAGTTTAGTATCATTATCAAAATTTAAATCTATTTAAACAAGTA  
ATATTCTTTTAAATATCTATTTATTTAAAATTTTTGTCAAATTAATATAAAATAAACGAGAATTA  
TTATATTTTAAATTCACTATTAATTAATAATAAAATAAAATTTATTTTAGGTTCAAATTTTTCACAAA  
CATAAAATTTAAATATTTATTATTTATTTAAAATTTAAACGAATTCAAATGTTATATATTCAATAAAT  
ACCATCCATATTTTAAATTTTACGAATGATAAATTTTTATCTAAATTCACTAATTATTAATTTATAAAT  
ATTTAAATTTAACATAAACACGAATATTCATTCAATTTGCTATTCAATTCATATTTAATTGTGACCAAAT  
AAATTATATCTCAACTACCAATCTAAACTAAATCAACTAGAAGCTATATATGCATGCTTTAGCAAGAATA  
CATTTTTAAAAAGTTAATGGTATCTTCGGACGACCTTAGTAATTAATAAAAAAAAAATCCTATGCTCAAGCAA  
CCAATCTCAATAGCTCGTACTAATAATGAAAGGCACCAAGACCTAACCTGGTCAAAGTTATCGCAAGAA  
AGTCGGCCTATGTTTTATCTAATTAACAAGATGTTTTTAGGTTCTATAATAATAAAATAACTATAGGT  
TTACAGAGCACTTTTCGTGCCTTTTGCTTTCTTCGCATGCTTTTGCGCTTGCATACTACTACTAGAATG  
CAATACAATACACACACAAAAATAAAACTTTATAAATATTATATTTAAATTATAATGATTATGATATAA  
ATTAATTTAAAATAAAAGTGAATTAATACTTTATTAATAAATAACACATAAGAAAAATTTCAATGTGA  
TTTTATTTGCATGGTCATTATAATATAAGAAAGAGTTTGAATTTTATTAATTTTCAATGTAATGTAATTG  
AATTTAATGTATCATTAGTTTAAATTTAAATATTAATTTAAATAAAATTTATTTAATATAAAACTTTTAAT  
CATAATTATAATAATAATTATTATTTTTAAATTTTATCACAATTAATTTTATCATTAAATTTACAAGAC  
AAATTTTCACGAAAGCCAACAGATGTCCTGTCAACAAGGTTTCTTCTGATCGATCTTTTCAAAGAATAA  
TTAAACAGTCAAATTTTTAACTTTAATCTTTAAAATTTAAATTAATTAACCTTTTACTTCTATTTTAAAT  
TTAATAATTAAGATTTAAATTTTACGGCTCAAGTAAAAAATGTTTCTTCTTTATGTTGTTAAACAAA  
AGTAAAATACGTTCTATTTATGAAATTTTTGTACAAAGTTAGCAAATTCATCATCATAAGATGCAA  
ACCCCTCGTACAAAATTTGGTACATTTACAATATTTTAAAGAGGGGTTAAAAAAGGTCACCCTGGGT  
AAATTCGATGAAATATTTTTTTTACTTTTTCACCTTTTGCTTCTTGAATCACGTTTCCCTTGAGCAGGA  
TAACATGAGAATTACAACGTGTTGTTGTTACAATCTTTGATTGTCCTCCATTGTTTCCAGCAATATCACCAGC  
AATCTTAAAGGCGTCAGAAGCCGTTCCTAGGAGCCCTCTTCTTGTAACCCAACCTGTGTACAATCCCTTC  
TCTGCTTTCCATCCGTTGGGAAAGGCGTTTTTGGCATAACCATCTTTGGTGAAAACATCACACCCTATA  
TTTCCATTAAGGGCAAAAAAACAATGTTACAACGACTAATAAATAACAACCTGCTTCAAAGATCAATAAT  
TTGTACAAATGAATTGATGAATAAGAGTGGAAAGCTGTGAAAATCATATCAAACCTGAACCCATTTTCT  
GAAATTTCTTCTAGGAAAGGCAATCGAGGGAATTTCTAGGTTTTTTTTTTTTTTTTTTTTTTGGTTAAGGC  
AAATGAATCCTCAAATACCCATTATTTAATGATGATTAATG

## Supplementary Fig. S8

### Promoter region of *NbTAA1*

AGTTTACACGTAGGTTGGACGTTTTGTTTAGTCTTTACCGAGACGAGGGAGGTTAGGGTGGGTACGGGGGT  
TTAGTAATAGAGCTTAGGAGTTACATTTTCGGGAGCCTTAGGATTTAGTTTTAGTGTCAATGCAAATGAGT  
TTAGCCAGTTTGCTGTTTTCCAATCTGACATGCTGATGCAGTAAACTCGGGACTTTGTAAGTAAAACTTG  
ATAAGAAGAAATACTAAAGGAAACACAGAGACAATCTGTGTATTTGATGTTGTTTAGTAAGTCTTGCCA  
AAGAAAATAAGTATATTAGCTCTCTTGCTTAGAATTGCATAAACTTGTGCAGATGGAGAGACCTTATGTT  
TTGCCTGGAGTTGTGGTAGAGCATTGCTTTAGCACTGGCCTTCTACACATGCATTGTCATGGGCAGCACA  
TGTATCATCATTCAATTGCACATGCCATTCTTATTTTTGCAGAATCAAACCATCCGACCACAACCTACTA  
TGAAAGTCTGATACAAATATTTTTATACTTTTTTTTCAGTTATTGAATTTGAGGGGAGCCTTGGCACAAC  
AGTAATGCATGCTGCTTCCCTGGTATCTAGTAGGTCCTCGTTTGGAGACATAGAAATAACTTACATTTGC  
ATAAATGCAAGAGAAACATAGCATAACAGTATACACGATCGTTCTCTCCTGCTCTAGTTGTAGAGCACTTG  
GTACTACTGAGTAAGCCCGATTTTCAGATGGATATTGAGTTTGTTTTTTTGAAGAAGATAAAAAATGATGAT  
GGCCTAACGGTCTTAATGAAATCATCGGAAATAGGATAACAATTCTAGATAAAGACAAAATCATATGCTT  
AATGCATGGTCAGCAAACCTTACTTAGTGTATGTGTTATTAGATATGGTAATAGATAATTGATAAAATAGT  
TAAGGTTTCGCGTAAGTTACTTGAATATCACGCTATCTAAAGGACTTTCTTAATAAAAAAAAAAAAAAAT  
TAGTAGTACAACATTTCTTTTCTCTTTTCTGTACATGGCCCTGCAAAGTTACTTAGTATATGTACTGTT  
GAGAGGTAACAATAACTGATAAAATAGTAGAGGTTTCGCGTAAGTTACTCGAACACCAGGCTAATTAATA  
GACACTATTTTGTGATCTAAATTTATACGACTGACTATTCCAACATACACAATTAAAGCGCCGACCAAGA  
GCCAGCAACATAACGACCCAACATCCATACAGAAACCAAAGATTCTAAAGAGAGAACTCAGTTAAGT  
TTCATCTTATTTTATAGAGTTTCGATTCTCTTTGATACCAACAGTCAAACCTTACATCACATGCAGTGC  
AGTTCTTCTAATTTAATGAAAACACTTAAAGAGACAAAAAATAAAAGAACTGACCATATTATTTTGT  
TTTTCATTTTTTATATTTTACCGTTGTCTCTTCAATTTTTTCCCTATCTGTTTTTTCTTTTATTATAAAAA  
ATACAAGTTAGTTGTTGACTTAGTAGTATCTTTGATCAAAATGGATAAACACAAAAATTTTTCCCTTAA  
TCAATCTAGATAAACACAAAAATTTCCCATATGTGTCAAAAATACAATTTCTTTGTTTAGATCAAGAG  
ATTTAATCTCCTTACTATACGGACAAAATTGCAAGACTCTATCTTATCTGCTTTCAACTGTTTTTTACCA  
TTCAAAGTATTCTCTCGAAACAGCTAAAATGCAAAAATCAAGATTAGAAGAGACATAATTACTTTATTA  
GGGAATCCATCTAAGATTCTGCCTATTAATTAGAAGGCTTTTATGGAGAATTAGTAAGAGAATCCATTT  
AAAATTCTATCTATTAATTAAGAGACTTTTGTGCATTAGCCTTTGCCTCCTCCCCTATATATAGTGCAG  
CATGCAAGACATGGATTAGTACAAAATCTGTCTTCTCCAATTATAAACATATCCTAAATAGCAATAGCT  
TATTTTTTTGATTGATCAAAGGTTTTTAGAAAGAAAGAAGAATG

## Promoter region of *NbYUCCA3*

CAAGTCATTTTAATTAACCTAACGCCTCTCAAATTCAGTATCATATATTCATATGATTGAATGGCCAA  
AATAATCAACATATTATTACTCTACCTGAGATGAAACAGAGTGAATCTCACTTCAAGCGTAGTGCACAGA  
ATACAAGTTATTTGATCACTTGGTTAAACCAAAATTTGCAAGTTGAAGCTTAGTAGATTGCTTGGCAAAA  
CCAAATTTTATTTGCAAAAGATTTGATCAACCTAGAGGAACTCAAACCTGATATGTGCAATTGACTAAGT  
TGATATGATGAGATCTCACTACCATCATAATCCCTCTCATTCTTCATCATATTATAGTTTGAACCTTCTT  
CTCTTTTCCAAGAAACTTTGGAGCAATTATAAAATTTTCTCTGTGTAACCTATAGATCACATGTTTCGATC  
CGTAAAATCAGTCATTAATGTTTGCATTAGGGTAGGTTGTCTACATTACACCCCTTGAGCTGCAGCCCTT  
CTCCGGACCTTGGCGTGAACATGGGATGACTTGTGCACCCGGGCTGCCCTTTTTCGCCCTCATTTCCATCAC  
TAACTACACTAATTACAATAAGAACTTGGATGGTGAATATGGGATTCAAATCTTGCTTGGAAAACCTT  
GTGCTCTCGGAGTATGTAGACAACCTCAATATGTTTTATAAAAGTTTCTACTTAAGTTAAATTTAGAAG  
ATATTGAGAAATAGCTGCACCTCATGTTTTCTGTTGGTTTTGTTTGTCTTTTGAAGGGTTTGCTTATGGG  
GTTTCATGCTCAATGTTGCTTTTAGGTGGAAGAAATGGAAGAGAGAGAACACACATTCAAAGAAAAAT  
GAAATTTGGATTTAGTGAAGGAAAATCATTATTTTTTCTTCTTGAGTTGGCTTTGGGAATAAAATGGA  
TAGAGTAGAAAGAGAAGACACATATTAACACACACACTCCCCTCACAAGTATAAACAATAGTGGACAAA  
ATAAATTTTAACAACATACCCTGCATATTCTCACAACGTGGGGTCCGGGAAGGTAATGTGTACGCAGATC  
TTACCTTTACCTTGTGAAGGTAGAGAAGTTATTTTTGATGGACTAACGGCTCAAGAAGAGCAGGACAAA  
GTCAAAGTCATTCAAATTTTCTTCTATTTAATTTTTGTTTTTTTCGCCTATATAGTTTTACATAGCAAAA  
TCAGTCTCAAGCTCGAATAAAGAAAGGGTTGCTATAAGCCGAAGTCAACTATGATGAATCTTTTGAATATT  
GAGTTCACATAATGAATATAGAAAATCCATATATTTGAACCCCAAGTTATATGGAATTGACAAGCAATTA  
ATTCTTCCCTCTGTCCAAGAACCAACAAGTGAGGCAAAGAAATTTACAAGTTCTTAATTATTCCTATTTT  
TTGCTCCATTTAAATGGAAAATAATCAAGCATTTCCTCTAAGTCAACGAATTAATTAAGACGTGTGATGC  
TAATAAGTCTAACTATCCCATACCCTCAACTTGAATATCTTAGTTGGAGCAAATTNGGTCATACAACCC  
ATACTATAATAGCATATAGCTTGGATATAGATGAAATGCTTTTATAGAAGTCTTTACATTGAATGTGGG  
GTCTCATTAAAATATATATAAGTTCAAAGAGAGTTAAACAAATGTATTTGTAATATCTAATGTGTAGATA  
CATTAAATTAAGAATATATGTACATCAAACAAAGGAGAGAAGACCACAGACTTTAATCATATGAAAAGG  
ACAATCAAGACATCATTTTCAAATCCTAATTACATGCCACCCCTTATGGCCAACCTCCCCCTATTTA  
AACCTCTCTATTCTCTAAACCTCTCCACACATTTGTTTGTCAAACAACCAACTAGAGAACTTATATTC  
CCTCTTGATCTCTTTTCTCTCTTTTGTCTTTTGTCCCCTAAATCTATCCAAAACAAAAATAGTACAT  
CAAAAAGTGAGTTATTTGCATATTTCAAGAAGCTTTTAATG
